# Supplementary material for: Involvement of CUL4A in Regulation of Multidrug Resistance to P-gp Substrate Drugs in Breast Cancer Cells
Source: Molecules. 2013 Dec 24;19(1):159–76. doi: 10.3390/molecules19010159 (PMC6271407; doi:10.3390/molecules19010159)

## Supplementary Materials

**Figure S1.** CUL4A activates *ERK1/2* signaling pathway. (A) The expression of *ERK1/2* and p-*ERK1/2* protein in MDA-MB-468-pBabe and MDA-MB-468-pBabe-CUL4A were assessed by Western blot. (B) The expression of *ERK1* and *ERK2* mRNA in MDA-MB-468-pBabe and MDA-MB-468-pBabe-CUL4A were assessed by RT-PCR. (C) The expression of *ERK1/2* and p-*ERK1/2* protein in MDA-MB-468/Adr-pSuper and MDA-MB-468/Adr-pSuper-shCUL4A were assessed by Western blot. (D) The expression of *ERK1* and *ERK2* mRNA in MDA-MB-468/Adr-pSuper and MDA-MB-468/Adr-pSuper-shCUL4A were assessed by RT-PCR. The expression of GAPDH mRNA and  $\beta$ -actin protein were also examined and served as controls for sample loading. Bar graphs represent mean  $\pm$  SEM of three independent experiments. 468: MDA-MB-468. <sup>##</sup>  $p < 0.01$  vs. pBabe cells; <sup>\*\*</sup>  $p < 0.01$  vs. pSuper cells.

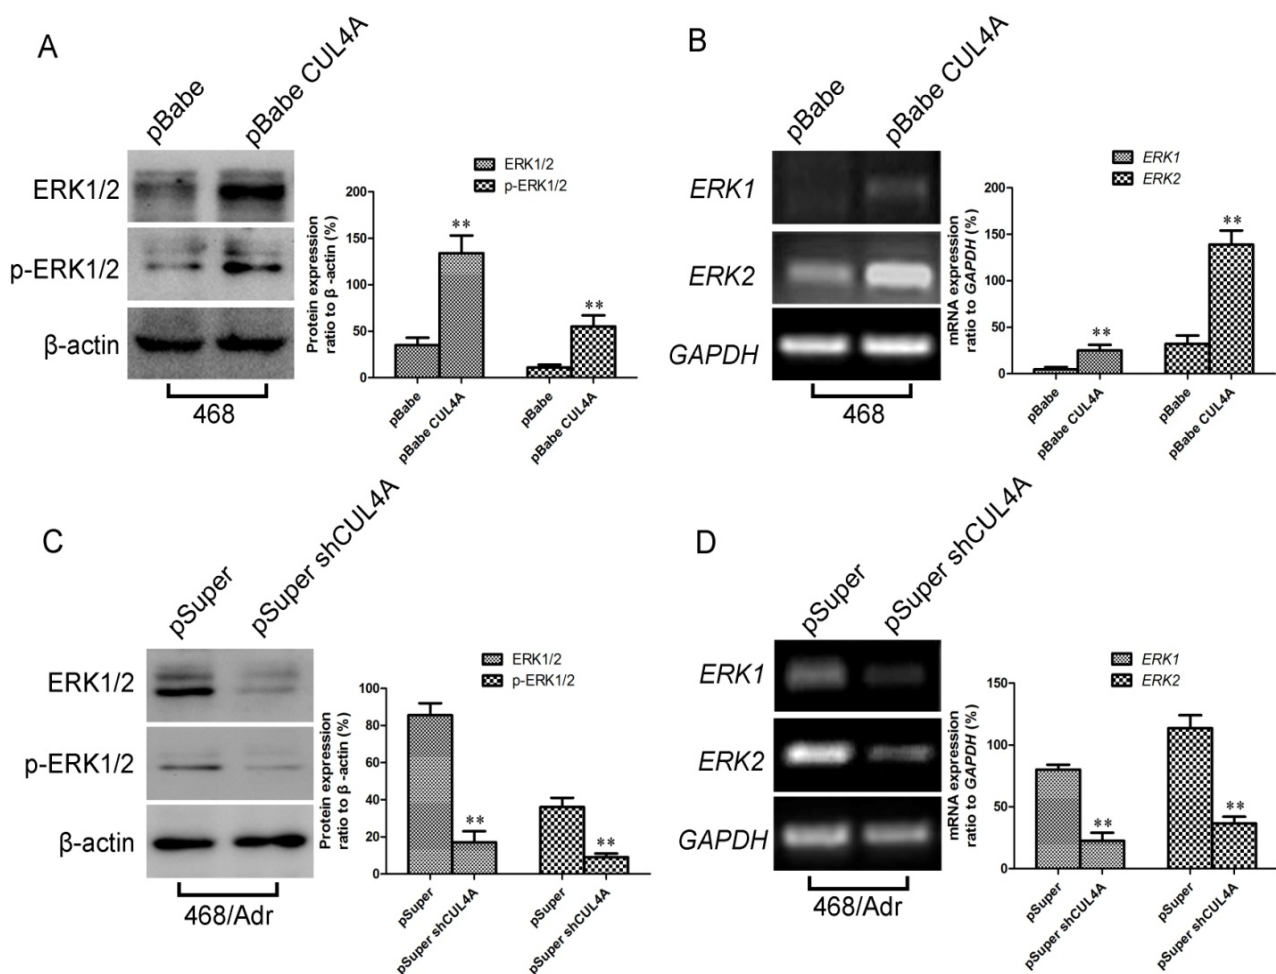

Supplement: Supplementary file 1 [file molecules-19-00159-s001.pdf]
